# Supplementary material for: CORO7 functions as a scaffold protein for the core kinase complex assembly of the Hippo pathway
Source: PubMed Central journal article supplement (PMC7949047; doi:10.1074/jbc.ra120.013297), 2020-11-23
Supplement: mmc1.pdf [file mmc1.pdf]

## Supporting Information

### **CORO7 functions as a scaffold protein for the core kinase complex assembly of the Hippo pathway**

Jina Park<sup>1,2,3</sup>, Kyoungho Jun<sup>1,2,3</sup>, Yujin Choi<sup>1,2,3</sup>, Eunju Yoon<sup>1,2</sup>, Wonho Kim<sup>2</sup>, Yoon-Gu Jang<sup>1,2</sup>, and Jongkyeong Chung<sup>1,2\*</sup>

<sup>1</sup>School of Biological Sciences, Seoul National University

<sup>2</sup>Institute of Molecular Biology and Genetics, Seoul National University, 1 Gwanak-ro, Gwanak-gu, Seoul 08826, Republic of Korea

<sup>3</sup>These authors contributed equally.

\*Corresponding author: Jongkyeong Chung  
Tel: +82 2 880 4399; E-mail: [jkc@snu.ac.kr](mailto:jkc@snu.ac.kr)

Running Head: CORO7 is a novel Hippo pathway component

Keywords: CORO7, *Drosophila*, Hippo pathway, pod1, Src

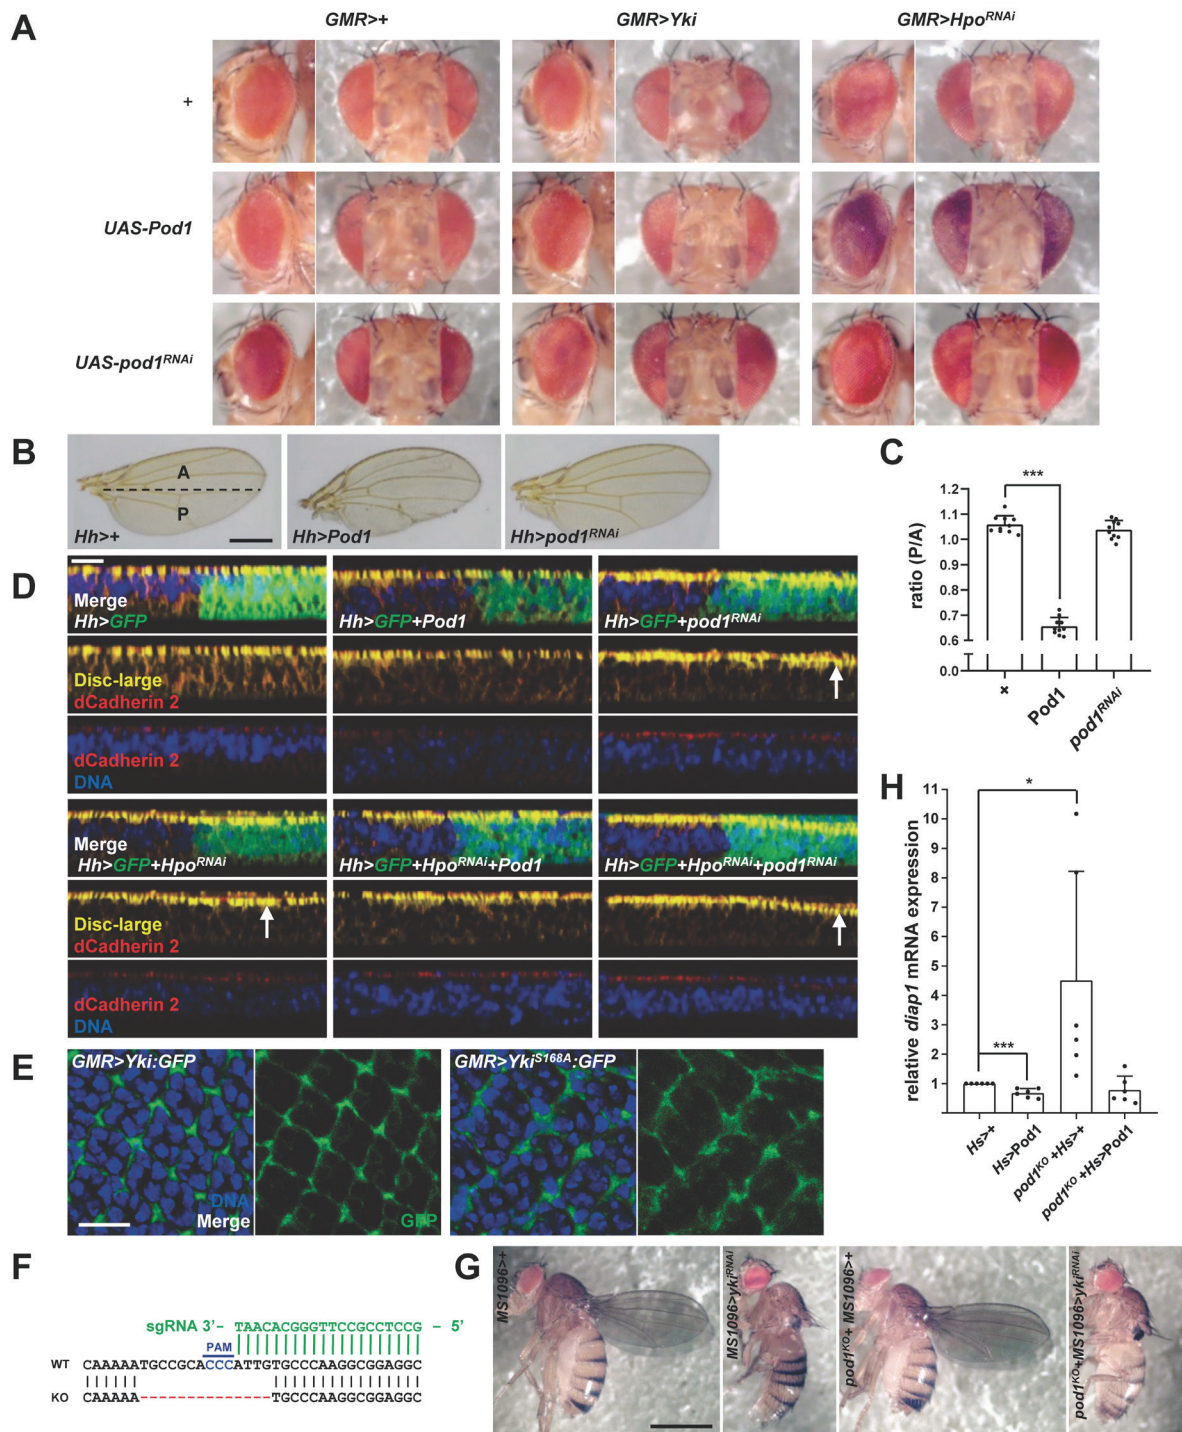

**Supplementary Figure 1. Genetic interaction between *pod1* and Hippo pathway genes in adult *Drosophila*.**

*A.* Pod1 overexpression or *pod1* knockdown was induced in eyes with or without the *Hpo* knockdown (*GMR>Hpo<sup>RNAi</sup>*) or Yki:GFP overexpression (*GMR>Yki*) by *GMR-GAL4*. *B.* Pod1 overexpression or *pod1* knockdown was induced in the posterior (P) region of the wings by *Hh-GAL4*. Dashed line is indicated to emphasize the margins of anterior (A) and posterior (P) regions of the wing. Scale bar, 500  $\mu$ m. *C.* Statistical analysis of the wing size of each genotype in (*B*). The ratio of the posterior (P) area over the anterior (A) area was measured. The error bars represent  $\pm$  S.D. from n=10. One Way-ANOVA and TUKEY post-test were applied (\*\*P<0.001). *D.* Vertical sections of *Drosophila* imaginal wing discs. The right half regions with GFP expression represent where GAL4-induced transgene is expressed. Pod1 overexpression (Pod1) or *pod1* knockdown (*pod1<sup>RNAi</sup>*) was induced without or with *Hpo* knockdown (*+Hpo<sup>RNAi</sup>*) by *Hh-GAL4*. Tissue overgrowth is indicated by arrows. Scale bar, 10  $\mu$ m. *E.* Eye discs of *Drosophila* larvae expressing Yki:GFP or YkiS168A:GFP by *GMR-GAL4*. Scale bar, 10  $\mu$ m. *F.* Genomic DNA sequences in wild-type (WT) or *pod1* KO *Drosophila* targeted by sgRNA. Protospacer adjacent motif (PAM) sequence is indicated. *G.* Representative pictures of *pod1* knockout (*pod1<sup>KO</sup>*) *Drosophila* without or with *yki* knockdown (*+yki<sup>RNAi</sup>*) by *MS1096-GAL4*. Scale bar, 1 mm. *H.* *diap1* mRNA expression levels of *pod1<sup>KO</sup>* *Drosophila* without or with Pod1 overexpression (Pod1) by *heat shock-GAL4* (*Hs>*) was determined by quantitative real-time PCR and normalized by a control gene, *rp49*. The error bars represent  $\pm$  S.D. from 6 independent experiments. One Way-ANOVA and TUKEY post-test were applied (\*P<0.05; \*\*P<0.001).

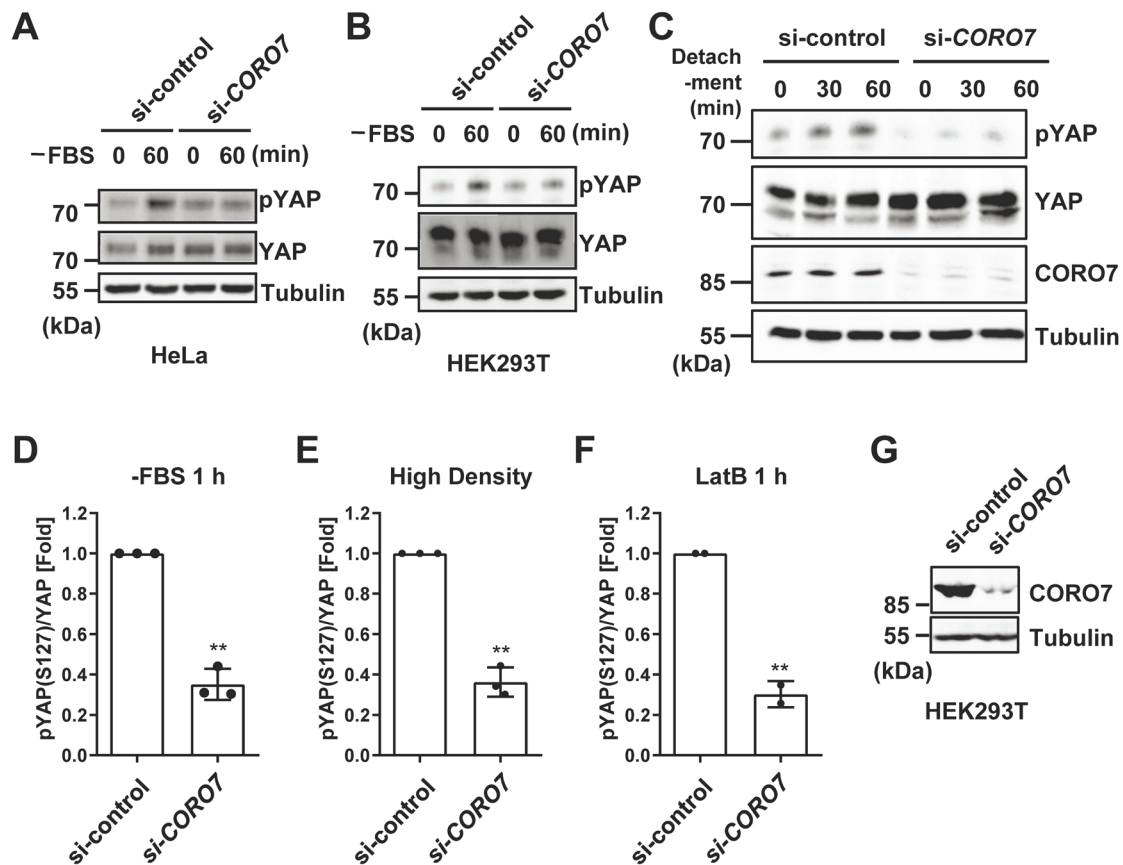

**Supplementary Figure 2. CORO7 is critical for the activation of the Hippo pathway in mammalian cells.**

*A, B.* HeLa (*A*) or HEK293 (*B*) cells were transfected with either non-targeting control siRNA (si-control) or siRNA targeting *CORO7* (si-*CORO7*) and were deprived of serum. The lysate samples were immunoblotted with anti-pYAP, -YAP, and -Tubulin antibodies. *C.* MDA-MB-231 cells were transfected with either non-targeting control siRNA (si-control) or siRNA targeting *CORO7* (si-*CORO7*) and were treated with trypsin to detach from the plate. The lysate samples were immunoblotted with anti-pYAP, -YAP, -*CORO7*, and -Tubulin antibodies. *D-F.* Quantification of the ratio of pS127-YAP bands to YAP protein levels under each indicated condition for Fig. 2 *A* (*D*), 2 *B* (*E*), and 2 *C* (*F*). The error bars represent  $\pm$  S.D. from  $n=2-3$ . Student's two-tailed t-test was applied (\*\* $P<0.01$ ). *G.* Knockdown efficiency of siRNA for *CORO7* used in Fig. 2 *D* and *E* was tested through immunoblotting for *CORO7* and Tubulin.

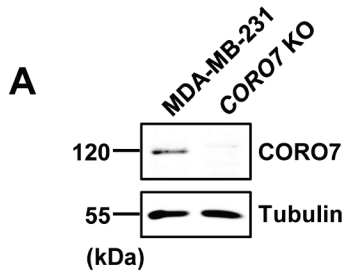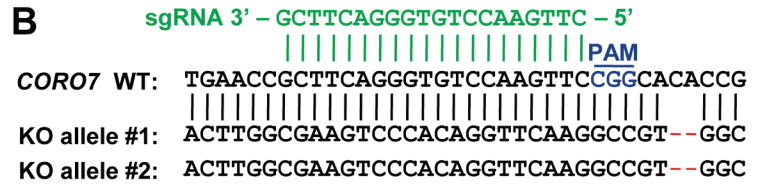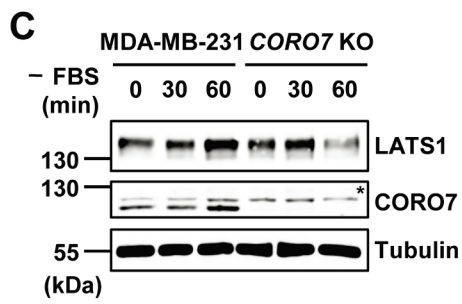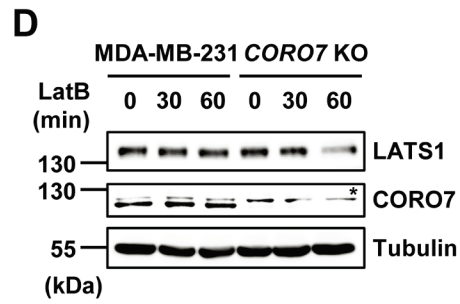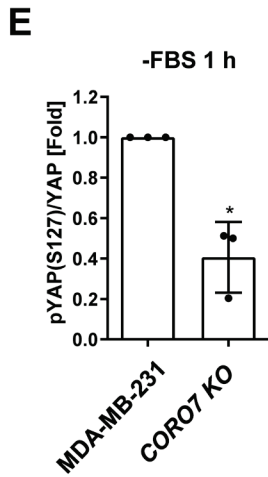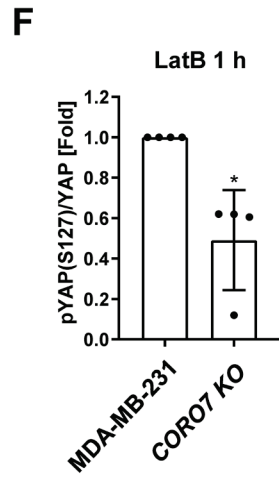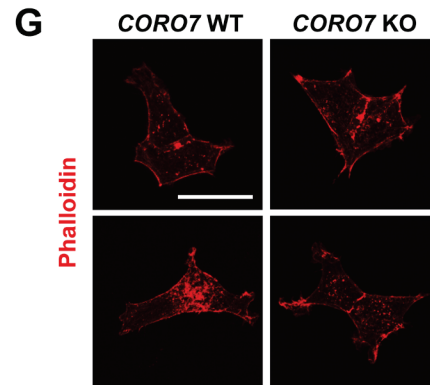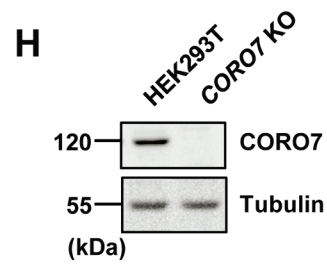

**Supplementary Figure 3. Activation of the Hippo pathway is inhibited in CORO7 KO cells.**

*A.* Wild-type (MDA-MB-231) or *CORO7* KO MDA-MB-231 cells were lysed and subjected to immunoblotting using anti-CORO7 and -Tubulin antibodies. *B.* Genomic DNA sequences in wild-type (WT) or *CORO7* KO MDA-MB-231 cells targeted by sgRNA. Protospacer adjacent motif (PAM) sequence is indicated. *C.* Wild-type MDA-MB-231 cells or MDA-MB-231 cells lacking *CORO7* (*CORO7* KO) were cultured under serum deprivation. The lysate samples were immunoblotted with anti-LATS1, -CORO7, and -Tubulin antibodies. *D.* Wild-type MDA-MB-231 cells or MDA-MB-231 cells lacking *CORO7* (*CORO7* KO) were treated with LatB (0.25  $\mu$ g/ml). The lysate samples were immunoblotted with the same antibodies as in (*C*). As the cell lysate samples from Fig. 2 G were also used here for immunoblotting with anti-LATS1 antibody, the CORO7 and Tubulin blots in Fig. 2 G were shown in this panel again. Data information: Non-specific bands are indicated by asterisks in (*C*) and (*D*). *E and F.* Quantification of the ratios of pS127-YAP band intensities to YAP protein levels under each indicated condition for Fig. 2 F (*E*) and 2 G (*F*). The error bars represent  $\pm$  S.D. from n=3-4. Student's two-tailed t-test was applied (\*P<0.05). *G.* Actin was stained with phalloidin in CORO7 WT and KO HEK293T cells. Representative images are shown. Scale bar, 10  $\mu$ m. *H.* Wild-type (HEK293T) or CORO7 KO HEK293T cells were lysed and subjected to immunoblotting using anti-CORO7 and -Tubulin antibodies.

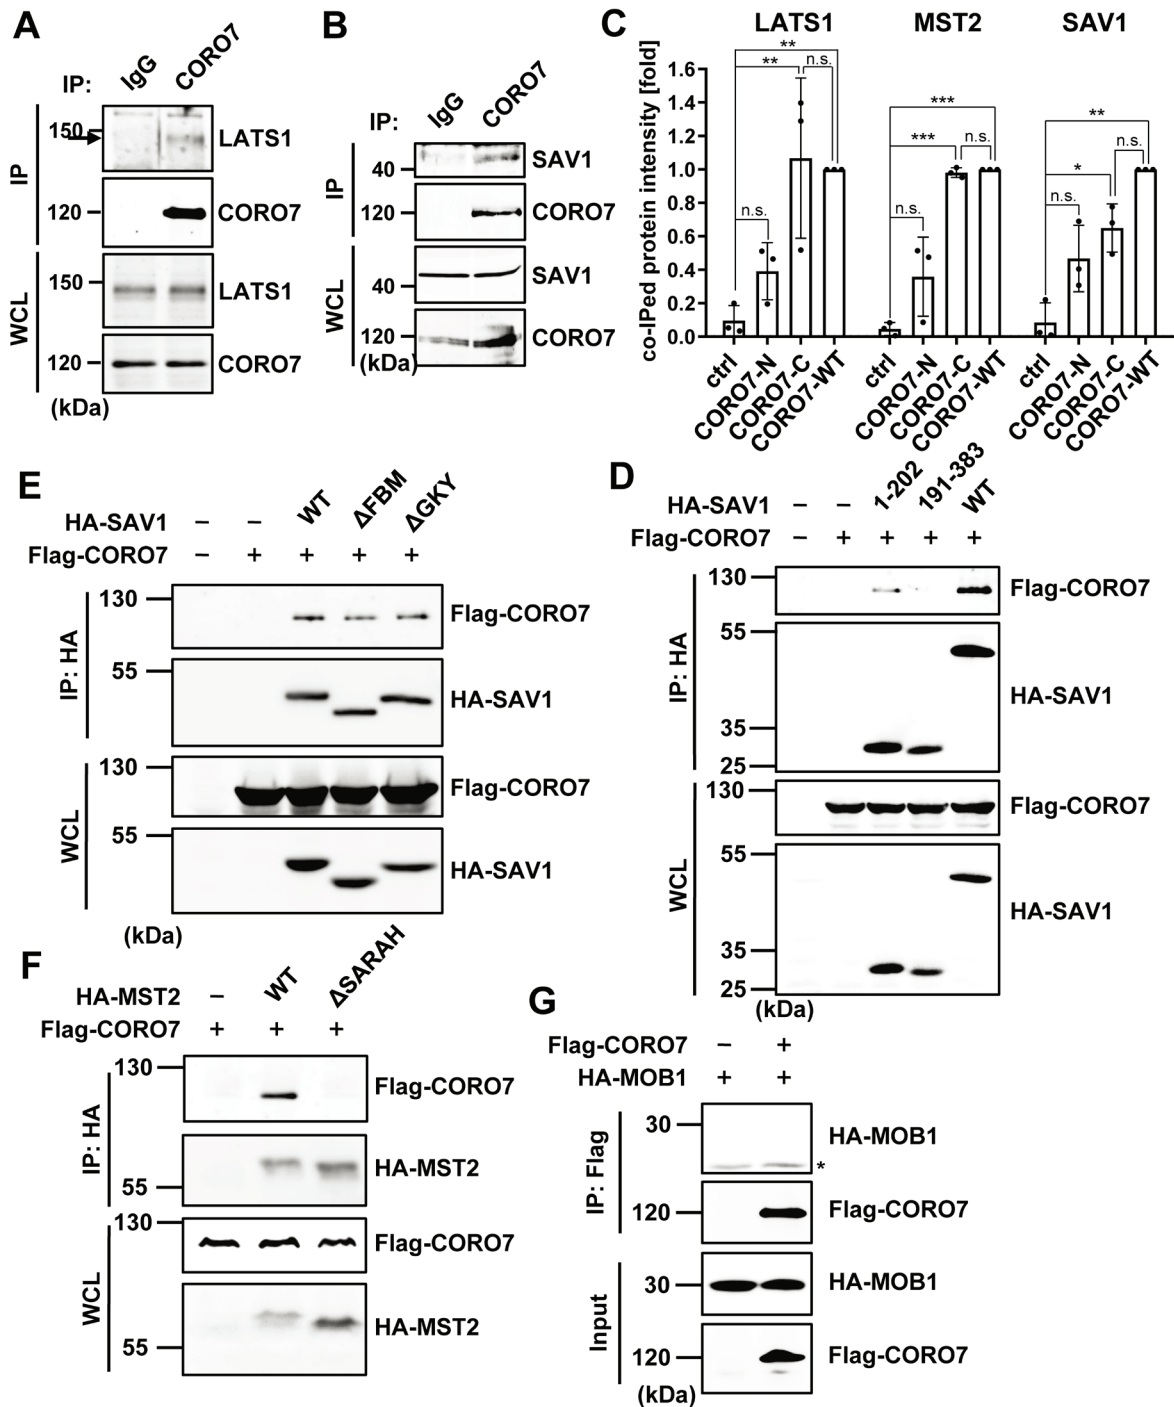

**Supplementary Figure 4. CORO7 forms a complex with the components of the Hippo pathway.**

*A.* Immunoprecipitation was performed on cell lysates from MDA-MB-231 cells with either anti-CORO7 or control (IgG) antibodies, and cell lysates were analyzed by western blotting for LATS1 and CORO7 level. *B.* Immunoprecipitation was performed on cell lysates from HEK293T cells with either anti-CORO7 or control (IgG) antibodies, and cell lysates were analyzed by western blotting for SAV1 and CORO7 level. *C.* Relative co-immunoprecipitated protein levels among vector, N-terminal, C-terminal or wild-type CORO7 with LATS1, MST2 or SAV1. Quantification for Fig. 3 D, 3 E, and 3 F. The error bars represent  $\pm$  S.D. from  $n=3$ . One Way-ANOVA and TUKEY post-test were applied (n.s., non-significant; \* $P<0.05$ ; \*\* $P<0.01$ ; \*\*\* $P<0.001$ ). *D.* Flag-CORO7 was transfected with the HA-tagged truncated forms of SAV1 in HEK293T cells. The lysates were immunoprecipitated by anti-HA antibody and immunoblotted with anti-Flag and -HA antibodies. The whole cell lysate (WCL) samples were loaded for indicating the expression levels. *E.* Flag-CORO7 was transfected with the HA-tagged SAV1 wild-type or mutants ( $\Delta$ FBM or  $\Delta$ GKY) in HEK293T cells. The lysates were immunoprecipitated by anti-HA antibody and immunoblotted with the same antibodies as in (*D*). The whole cell lysate (WCL) samples were loaded for indicating the expression levels. SAV1  $\Delta$ GKY mutant lacks the first three amino acids (GKY) of the FBM in SAV1. *F.* Flag-CORO7 was transfected with the HA-tagged MST2 wild-type or mutant ( $\Delta$ SARAH) in HEK293T cells. The lysates were immunoprecipitated by anti-HA antibody and immunoblotted with the same antibodies as in (*D*). The whole cell lysate (WCL) samples were loaded for indicating the expression levels. *G.* Flag-CORO7 was transfected with the HA-MOB1 in HEK293T cells. The lysates were immunoprecipitated by anti-Flag antibody and immunoblotted with the same antibodies as in (*D*). The whole cell lysate (WCL) samples were loaded for indicating the expression levels. Data information: Non-specific band is indicated by an asterisk in (*G*).



**A**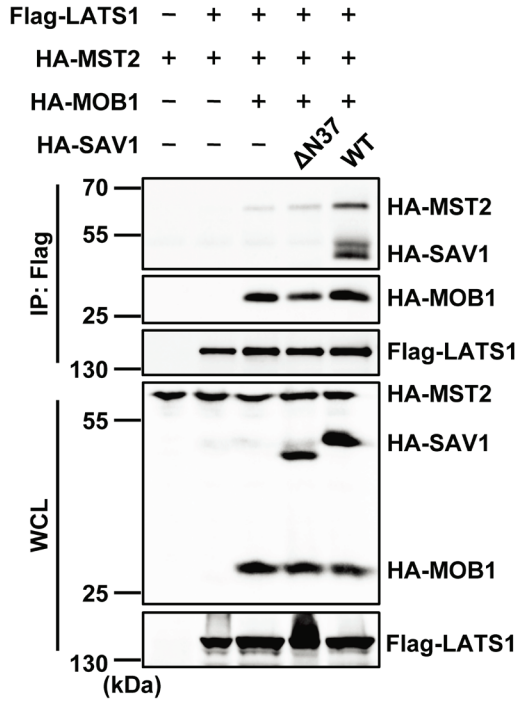**B**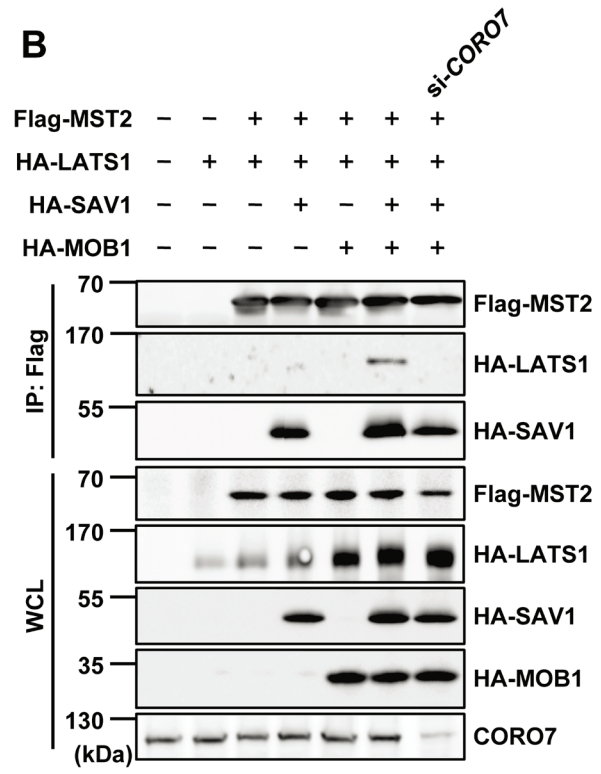**C**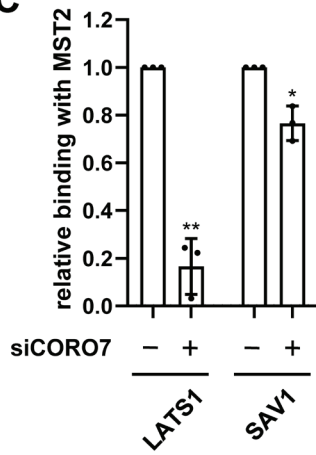**D**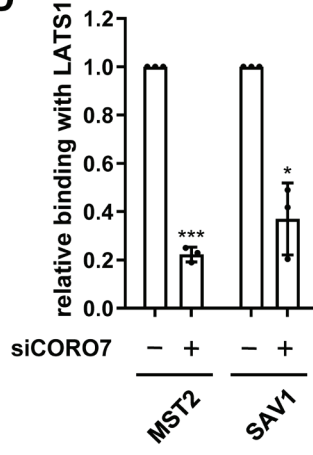**E**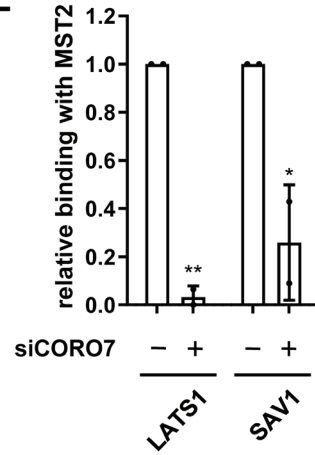

**Supplementary Figure 5. CORO7 is necessary for the formation of the core Hippo kinase complex.**

*A.* HEK293T cells were transfected with Flag-LATS1, HA-MST2, HA-MOB1, and HA-SAV1  $\Delta$ N37 or wild-type. The lysates were immunoprecipitated by anti-Flag antibody and were immunoblotted with anti-HA and -Flag antibodies. The whole cell lysate (WCL) samples were loaded for indicating the expression levels. *B.* Flag-MST2, HA-LATS1, HA-SAV1, and HA-MOB1 were transfected in HEK293T cells to observe the co-immunoprecipitation between Flag-MST2 and the rest. siRNA targeting CORO7 was treated in the indicated lane (si-CORO7). The lysates were immunoprecipitated by anti-Flag antibody and were immunoblotted with anti-HA and -Flag antibodies. The whole cell lysate (WCL) samples were loaded for indicating the expression levels and CORO7 was immunoblotted to verify the efficiency of knockdown. *C.* Relative co-immunoprecipitated LATS1 or SAV1 with MST2 under each indicated condition. Quantification for Fig. 4 A. The error bars represent  $\pm$  S.D. from n=3. Student's two-tailed t-test was applied (\*P<0.05; \*\*P<0.01). *D.* Relative co-immunoprecipitated MST2 or SAV1 with LATS1 under each indicated condition. Quantification for Fig. 4 B. The error bars represent  $\pm$  S.D. from n=3 (\*P<0.05; \*\*\*P<0.001). *E.* Relative co-immunoprecipitated LATS1 or SAV1 with MST2 under each indicated condition. Quantification for Fig. 4 C. The error bars represent  $\pm$  S.D. from n=2. Student's two-tailed t-test was applied (\*P<0.05; \*\*P<0.01).

**A**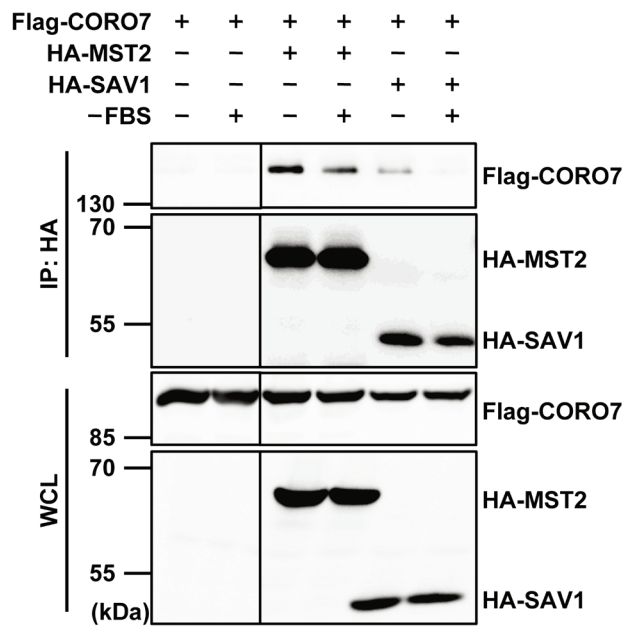**B**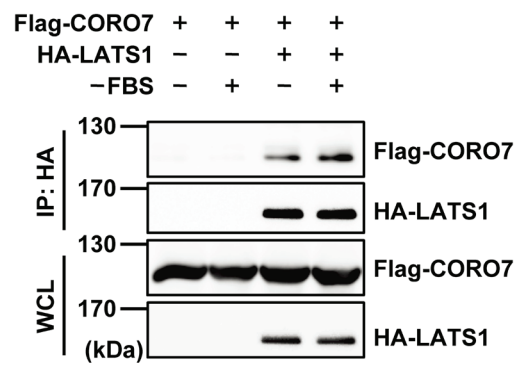**C**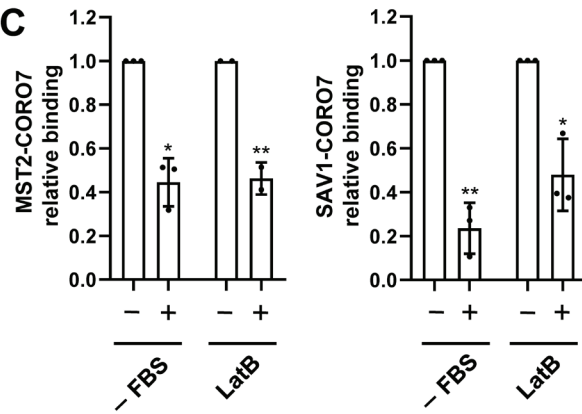**D**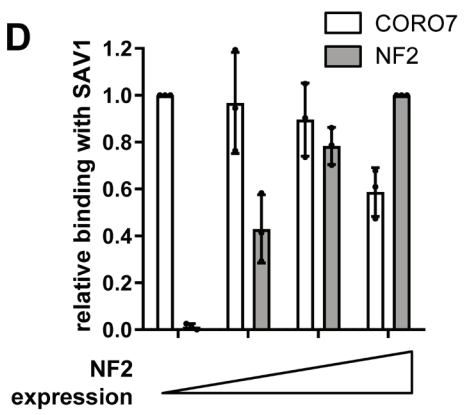**E**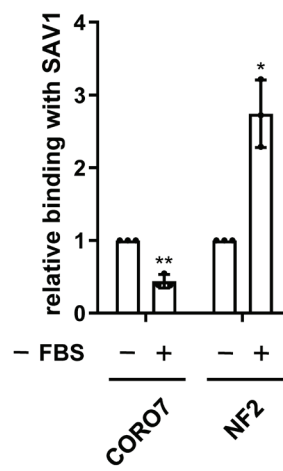

**Supplementary Figure 6. Regulation of the interaction of CORO7 with Hippo pathway components by Hippo-activating signals.**

*A.* 24 h after seeded to 15% confluency, HEK293T cells transfected with Flag-CORO7 and HA-MST2 or HA-SAV1 were deprived of serum (-FBS) for 1 h. The cell lysate samples were immunoprecipitated with anti-HA antibody and were immunoblotted with anti-HA or -Flag antibodies. The whole cell lysate (WCL) samples were loaded for indicating the expression levels. *B.* 24 h after seeded to 15% confluency, HEK293T cells transfected with Flag-CORO7 and HA-LATS1 were deprived of serum (-FBS) for 1 h. The cell lysate samples were immunoprecipitated with anti-HA antibody and were immunoblotted with anti-HA or -Flag antibodies. The whole cell lysate (WCL) samples were loaded for indicating the expression levels. The two first lanes of (*A*) and (*B*) are identical. *C.* Relative co-immunoprecipitated MST2 or SAV1 with CORO7 under each indicated condition. Quantification for Fig. 5 A. The error bars represent  $\pm$  S.D. from n=2-3. Student's two-tailed t-test was applied (\*P<0.05; \*\*P<0.01). *D.* Relative co-immunoprecipitated CORO7 or NF2 with SAV1 under each indicated condition. Quantification for Fig. 5 B. The error bars represent  $\pm$  S.D. from n=3. *E.* Relative co-immunoprecipitated CORO7 or NF2 with SAV1 under each indicated condition. Quantification for Fig. 5 C. The error bars represent  $\pm$  S.D. from n=3. Student's two-tailed t-test was applied (\*P<0.05; \*\*P<0.01).

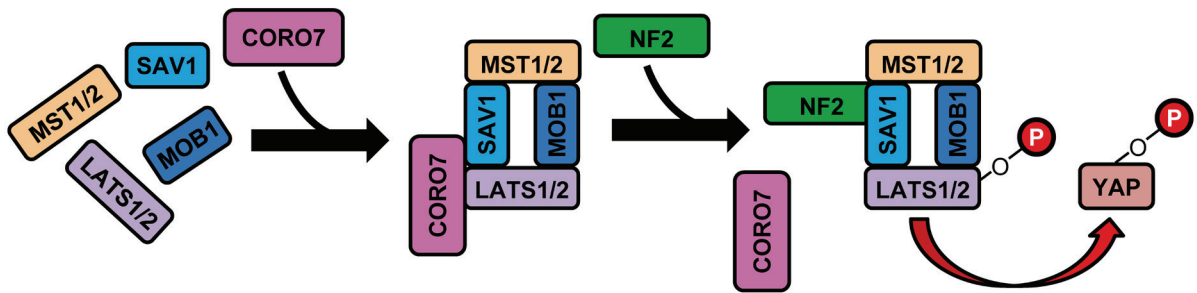

Supplementary Figure 7. Schematic model for the scaffold role of CORO7 in the Hippo pathway.

**Supplementary Table 1. Candidate interactors for Hippo pathway genes from interactome-databases.**

| <b>Gene</b> | <b>Interacting component</b> | <b>Gene</b> | <b>Interacting component</b> | <b>Gene</b> | <b>Interacting component</b> |
|-------------|------------------------------|-------------|------------------------------|-------------|------------------------------|
| AGO1        | Hpo                          | Fim         | Ft, Mer                      | woc         | Mer                          |
| Arf79F      | Sav, Hpo                     | grn         | Sav                          | ref(2)P     | D, Mer                       |
| Ars2        | Mer, Fj, Wts                 | HLH4C       | Yki, Mer                     | Sec31       | Ft, Yki                      |
| RnrS        | Ft                           | Hrs         | Ft, Fj                       | SEMG1       | Sav                          |
| trn         | Mer                          | igl         | Mer                          | SERCA       | Mts, Ds, Fj, Wts, Hpo        |
| CG11999     | Fj, Wts                      | inc         | Ex                           | shrb        | D, Mer                       |
| CG12645     | Kibra, Sav                   | kune        | Sav                          | SNCF        | Ft, Mer                      |
| CG13705     | Ft, Hpo                      | (1)G0289    | Mts, Sav, Ds                 | Snx17       | Ex                           |
| CG17841     | Mer                          | Lasp        | Ft, Yki                      | Spn         | Tao, Mer                     |
| Cpsf5       | Sav, Yki                     | Mbs         | Dco, Mer                     | Tab2        | Kibra, Yki                   |
| babo        | Kibra                        | mod         | Hpo, Mer                     | TER94       | Ft, Mer                      |
| CG9581      | Ds, Sav, Yki                 | mor         | Sd, Yki, Mer                 | tum         | D, Mer                       |
| dUfd2       | Mer                          | mwh         | Mer                          | Ythdf       | Sav                          |
| chinmo      | Hpo, Mer                     | NXPH2       | FAT5                         | drk         | Ex, Sav                      |
| Hel25E      | Ft                           | pod1        | D, Mer                       |             |                              |

**Supplementary Table 2. Candidate regulators for CORO7 from interactome-databases.**

| <b>Gene</b> | <b>BioPlex</b> | <b>BioGRID</b> | <b>STRING</b> | <b>DroID</b> |
|-------------|----------------|----------------|---------------|--------------|
| THBS3       | O              | O              |               |              |
| ASB6        | O              | O              |               |              |
| CNTF        | O              | O              |               |              |
| KLHL20      | O              | O              | O             |              |
| SRC         |                | O              | O             |              |
| MYH10       |                | O              |               | O            |
| RHOA        |                | O              |               |              |
| AP1G1       |                | O              | O             |              |
| CUL1        |                | O              | O             |              |
| DAG1        |                | O              | O             |              |
| BUB1        |                | O              |               | O            |
| NF2         |                | O              |               | O            |
| BTBD10      |                | O              |               | O            |
